# Supplementary material
Source: Royal Society of Chemistry journal article supplement (doi:10.1039/d5ta09022a)
Supplement: d5ta09022a1.pdf [file d5ta09022a1.pdf]

## Supporting Information

### **Analysing Pd Metallosurfactant derived single atom catalyst for Biofouling Mitigation and oxygen reduction reaction in microbial fuel cell**

*Pooja Devi*<sup>†a</sup>, *Greesh Kumar*<sup>†b</sup>, *Uma Batra*<sup>c</sup>, *Ramendra Sundar Dey*<sup>\*b</sup>, and *Gurpreet Kaur*<sup>\*a</sup>

<sup>a</sup>Department of Chemistry, Panjab University, Sector 14, Chandigarh, India.

<sup>b</sup>Institute of Nano Science and Technology (INST), Mohali Knowledge City, Sector 81, S.A.S. Nagar, Mohali-140306, Punjab, India.

<sup>c</sup>Department of Materials and Metallurgical engineering, PEC University of Technology, Chandigarh 160012, India.

† These authors contributed equally to this work.

Corresponding author:

Ramendra Sundar Dey; Email: [rsdey@inst.ac.in](mailto:rsdey@inst.ac.in)

Gurpreet Kaur; Email: [gurpreet14@pu.ac.in](mailto:gurpreet14@pu.ac.in) Tel: +91-1722534431

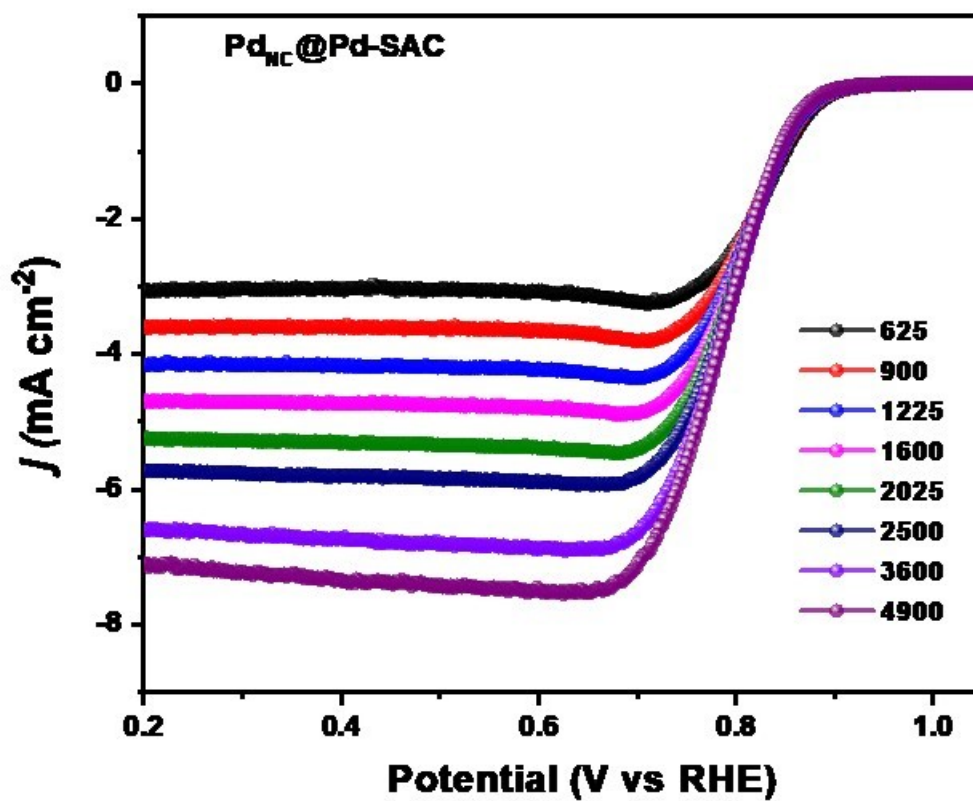

**Figure S1.** LSV plots of  $Pd_{NC}@Pd-SAC$  catalyst at different rotations (625-4900) in oxygen saturated alkaline solution.

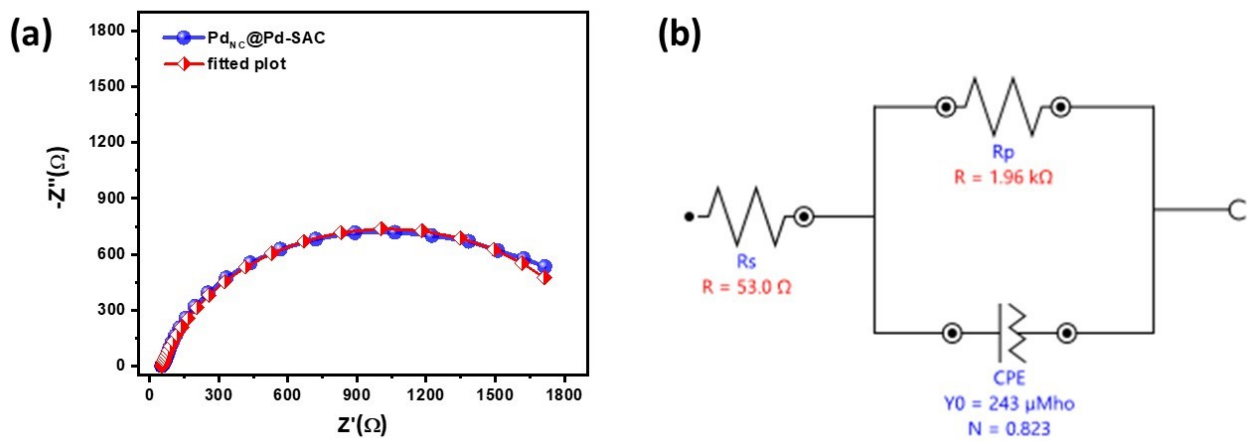

**Figure S2.** (a) Electrochemical impedance spectroscopy (EIS) spectra of Pd<sub>NC</sub>@Pd-SAC material; (b) equivalent fitted circuit of Pd<sub>NC</sub>@Pd-SAC material.

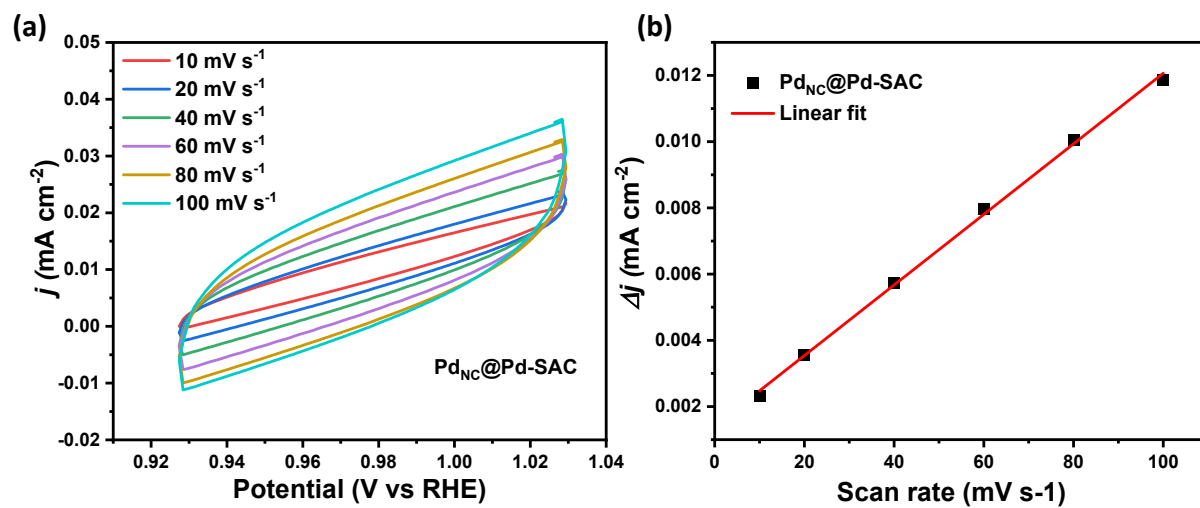

**Figure S3.** Electrochemical active surface area analysis (a) CV curves of Pd<sub>NC</sub>@Pd-SAC catalyst at different scan rate (b) Linear fitting of capacitive currents of the Pd<sub>NC</sub>@Pd-SAC catalyst vs scan rate

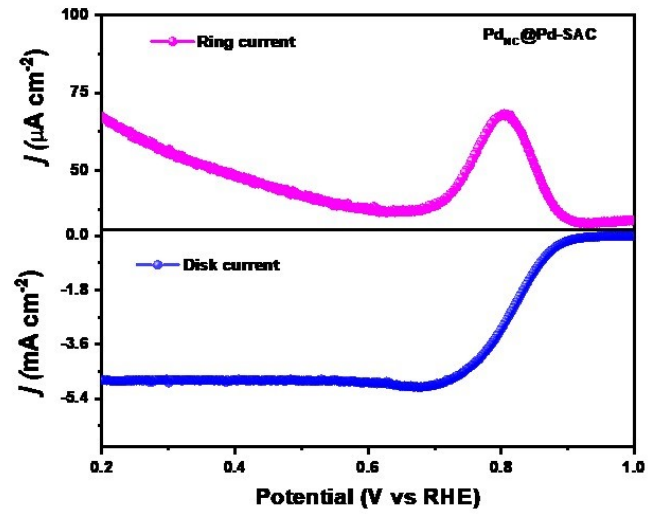

**Figure S4.** Linear sweep voltammetry (LSV) polarization curve of Pd<sub>NC</sub>@Pd-SAC catalyst at 1600 rpm in O<sub>2</sub> saturated 0.1 M KOH electrolyte solution with ring and disk current density.

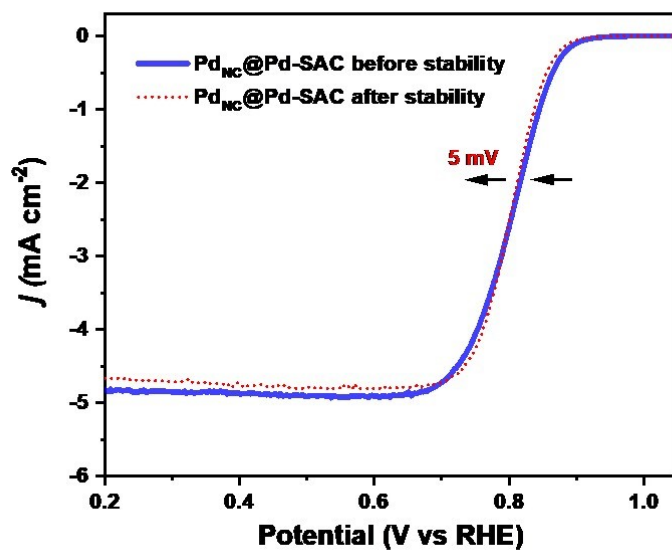

**Figure S5.** LSV curve of Pd<sub>NC</sub>@Pd-SAC catalyst in 0.1 M KOH electrolyte before and after ORR analysis in alkaline media at 1600 rpm.

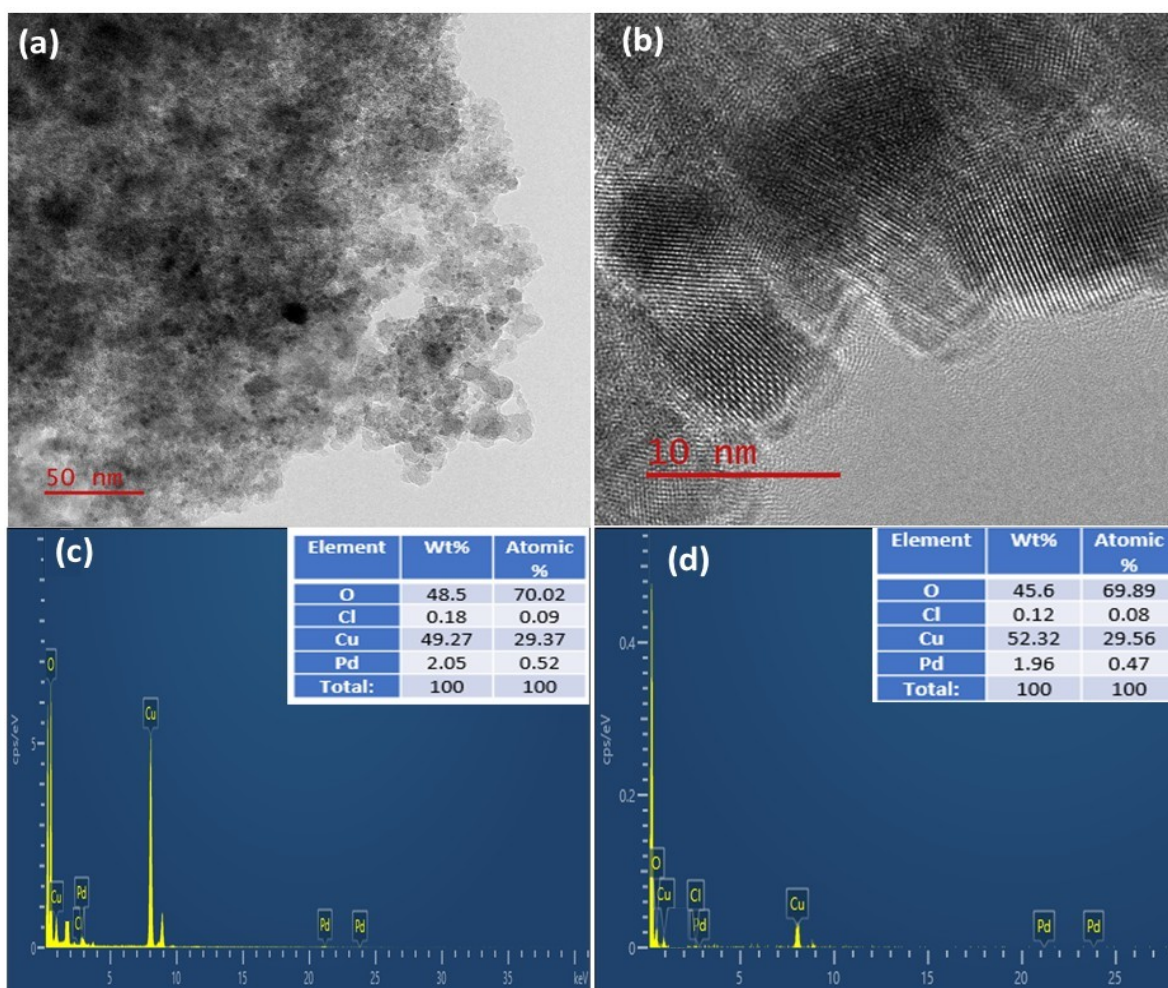

**Figure S6.** (a, b) HRTEM images after ORR analysis and (c) EDS spectra before and (d) after ORR analysis of Pd<sub>NC</sub>@Pd-SAC catalyst in alkaline media at 1600 rpm.

Table S1: Comparison of different Pd based and Pd based bimetallic catalyst for ORR performance.

| <b>Catalyst Name</b>                         | <b>Half-Wave Potential (<math>E_{1/2}</math> vs RHE)</b> | <b>Characteristic Features</b>                                                                                                                  | <b>Reference</b> |
|----------------------------------------------|----------------------------------------------------------|-------------------------------------------------------------------------------------------------------------------------------------------------|------------------|
| <b>Pd(II)-N macrocycle/CNT</b>               | 0.86 V                                                   | N-coordinated Pd(II) SACs on CNTs; better O <sub>2</sub> intermediate binding; high mass activity vs Pd bulk                                    | [1]              |
| <b>PdNiMnO-PF</b>                            | 0.84 V                                                   | Porous architecture; enhanced Pd-support interaction; high J <sub>d</sub> value; surface oxygenation tuning                                     | [2]              |
| <b>7.5% Pd@SmMn<sub>2</sub>O<sub>5</sub></b> | 0.83 V                                                   | Pd on mullite nanorods; atomic contact interface; moderate d-band; supports LAM mechanism                                                       | [3]              |
| <b>Pd/FeCoNC</b>                             | 0.88 V                                                   | Fe/Co/N co-doped carbon; graphene encapsulation; high durability; large diffusion current; Pd anchored on pyridinic N sites                     | [4]              |
| <b>Pd/TiO<sub>2</sub>-C</b>                  | 0.88 V                                                   | TiO <sub>2</sub> -C support with SMSI effect; photochemical synthesis; electron-rich Pd; high ORR activity                                      | [5]              |
| <b>Pd/N-HsGY</b>                             | 0.849 V                                                  | Pure Pd(0) on N-graphyne; highest ORR activity; superior to Pd/C and Pt/C; high intrinsic and mass activity; durable Zn-air battery performance | [6]              |
| <b>Dealloyed PdNi/C</b>                      | 0.87 V                                                   | Electrochemical dealloying for surface tuning; Pd-rich surface.                                                                                 | [7]              |
| <b>Pd@PdFe core-shell icosahedra</b>         | 0.90 V                                                   | Highest MA and SA; homogeneous dispersion; core-shell design.                                                                                   | [8]              |
| <b>PdCo@NPNC</b>                             | 0.914 V                                                  | N-doped porous carbon; 6.5× higher mass activity than Pt/C.                                                                                     | [9]              |
| <b>Pd<sub>NC</sub>@Pd-SAC</b>                | 0.82 V                                                   | Synergistic role of Pd SACs and Pd NPs to enhance ORR activity.                                                                                 | This work        |

## References

- [1] Q. Liu, Y. Peng, Q. Li, T. He, D. Morris, F. Nichols, R. Mercado, P. Zhang, S. Chen, *ACS Applied Materials & Interfaces* **2020**, 12, 17641-17650.
- [2] W. Zhang, J. Chang, G. Wang, Z. Li, M. Wang, Y. Zhu, B. Li, H. Zhou, G. Wang, M. Gu, Z. Feng, Y. Yang, *Energy & Environmental Science* **2022**, 15, 1573-1584.
- [3] C. Zhao, A. Wang, S. Gao, L. Wang, M. Yu, Z. Yang, D. Shao, J. Niu, G. Wang, W. Li, W. Wang, *ACS Applied Energy Materials* **2022**, 5, 3298-3306.
- [4] Z. Cui, X. Bai, *ACS Applied Materials & Interfaces* **2022**, 14, 9024-9035.
- [5] X. Wu, Q. Li, X. Wang, Z. Xie, X. Yang, X. Yu, X. Zhang, Z. Lu, L. Li, *New Journal of Chemistry* **2021**, 45, 18379-18386.
- [6] W. Si, Z. Yang, X. Hu, Q. Lv, X. Li, F. Zhao, J. He, C. Huang, *Journal of Materials Chemistry A* **2021**, 9, 14507-14514.
- [7] X. Lu, M. Ahmadi, F. J. DiSalvo, H. D. Abruña, *ACS Catalysis* **2020**, 10, 5891-5898.
- [8] X. Li, X. Li, C. Liu, H. Huang, P. Gao, F. Ahmad, L. Luo, Y. Ye, Z. Geng, G. Wang, R. Si, C. Ma, J. Yang, J. Zeng, *Nano Letters* **2020**, 20, 1403-1409.
- [9] Z. Zhang, S. Liu, X. Tian, J. Wang, P. Xu, F. Xiao, S. Wang, *Journal of Materials Chemistry A* **2017**, 5, 10876-10884.
